# Supplementary material for: Permissive fluid volume in adult patients undergoing extracorporeal membrane oxygenation treatment
Source: Springer Nature journal article supplement (doi:10.1186/s13054-018-2211-x), 2018-10-26
Supplement: MOESM2 [file 16230250]

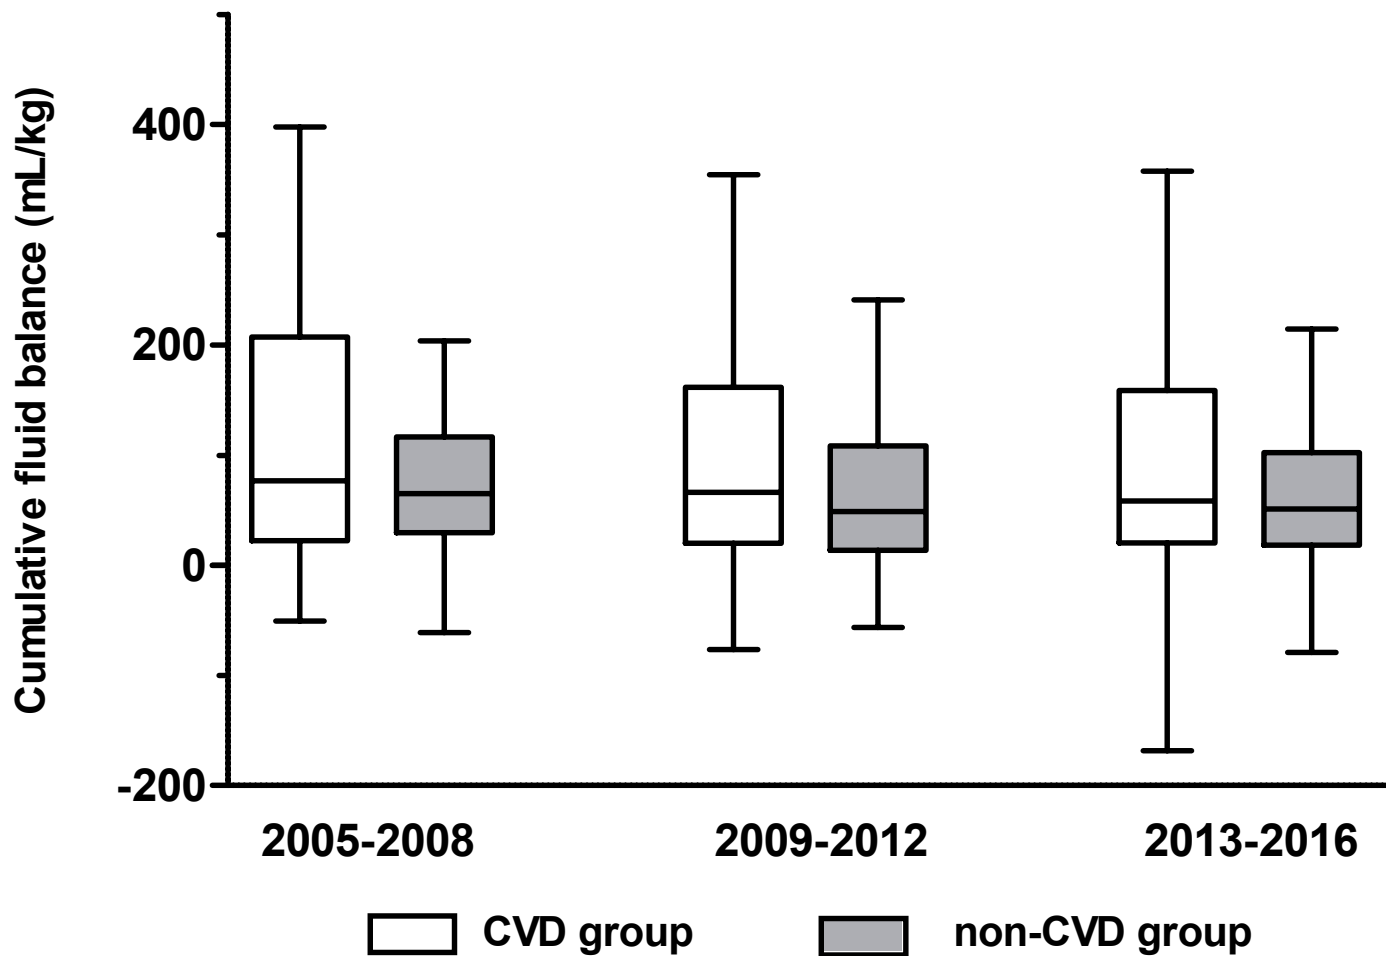

**Figure S1.** Cumulative fluid balance according to ECMO treatment vintage.
